# Supplementary material for: Photoinduced energy transfer in a fullerene–oligophenylenevinylene conjugate
Source: Royal Society of Chemistry journal article supplement (doi:10.1039/b000564i), 2000-01-01
Supplement: b000564icalc.doc [file b000564icalc.doc]

**Supplementary data.** Calculations of energy transfer rate constants.

By using the luminescence data of the fragment which act as energy donor (**2**) and the absorption spectrum of the acceptor (**FP**), it is possible to draw some conclusions regarding the type of energy transfer mechanism that is operative in **1**. Two mechanisms, the dipole-dipole (Förster)1 or the double electron exchange (Dexter),2 may be involved. The possible contribution by the dipole-dipole energy transfer, which is pertinent to singlet-singlet interaction schemes, can be evaluated on the basis of the following equations:

(eq. 1)

(eq. 2)

These allow to obtain estimates for (i) the energy transfer rate constant, kenF , and (ii) the critical transfer radius, Rc, i.e. the distance between the fragments for which kenF equalises the intrinsic deactivation of the donor, kd = -1. In eqs. 1 and 2,  and  are the luminescence quantum yield and lifetime of the donor fragment **2** is the overlap integral between the luminescence spectrum on an energy scale (cm-1) of the donor (F() of **2**) and the absorption spectrum of the acceptor, (() of **FP**); JF was 1.4  10-14 cm6 mol-1; K2 is a geometric factor (tentatively taken as 2/3), N = 6.02 1023 mol-1 and n is the refractive index of the solvent. Calculations provided Rc = 35.3 Å, and kenF > 1012 s-1 for d  10 Å.

It should be pointed out that these findings are appropriate for a two-center system whose donating and accepting components retain their electronic identity.3 However, since from the absorption spectra this cannot be assumed for granted (see electrochemical results) the alternative mechanism for energy transfer, the double-electron exchange Dexter-type transfer, should be also considered.2 This latter mechanism requires a certain amount of through bond electronic communication (represented by the electronic coupling term H, see below), and is usually found to be important for triplet-triplet transfers.

We have performed model calculations according to the Dexter approach by evaluating the pertinent spectral overlap, JD, equations (eqs. 3-5), with JD = 1.4  10-4 cm. Estimates of kenD were obtained for Ho values ranging from 10 to 100 cm-1, which correspond to moderately coupled moieties,4 and by assuming an attenuation factor  = 0.1 Å-1.5 do values ranging from 3 to 10 Å were employed, roughly corresponding to side-to-side and center-to-center geometries, respectively.

(eq. 3)

(eq. 4)

(eq. 5)

We found that the Förster mechanism is mostly effective up to d = 15 to 20 Å and that an interplay of the two energy transfer mechanisms can only be operative for longer distances or for larger H values; at any rate, energy transfer is always found to predominate over intrinsic deactivation, ken >> kd (ken = kenF + kenD), and the sensitization step is expected to be quantitative (efficiency > 90%) up to d = 30 Å.

**References**

1 Th. Förster, *Discuss. Faraday Soc*., 1959, **27**, 7.

2 D. L. Dexter, *J. Chem. Phys*., 1953, **21**, 836.

3 V. Balzani and F. Scandola, *Supramolecular Photochemistry*, Ellis Horwood, Chichester, U. K. 1991, ch. 3.

4 Th. Förster, *Modern Quantum Chemistry* (Sinaoglu, O. Ed.), Academic Press, New York, 1965, vol. 111, p. 93; G. J. Kavarnos, *Fundamentals of Photoinduced Electron Transfer*, VCH Publishers, New York, 1993, ch. 6.

5 A. Harrimann and R. Ziessel, *Chem. Commun.*, 1996, 1707.
